# Supplementary material for: Pembrolizumab plus dinaciclib in patients with hematologic malignancies: the phase 1b KEYNOTE-155 study
Source: PubMed Central journal article supplement — Blood Adv. 2022 Feb 16;6(4):1232–42. doi: 10.1182/bloodadvances.2021005872 (PMC8864641; doi:10.1182/bloodadvances.2021005872), 2022-02-16
Supplement: advancesADV2021005872-suppl1.pdf [file advancesADV2021005872-suppl1.pdf]

## Supplemental Material

**Table S1. Summary of treatment-related adverse events in the total study population**

|                                      | TRAEs, n (%)       |                       |
|--------------------------------------|--------------------|-----------------------|
|                                      | N = 72             |                       |
|                                      | Any grade<br>n (%) | Grade 3 to 5<br>n (%) |
| Patients with no TRAEs               | 26 (36.1)          | 44 (61.1)             |
| Patients with ≥1 TRAE                | 46 (63.9)          | 28 (38.9)             |
| Decreased neutrophils <sup>a</sup>   | 14 (19.4)          | 13 (18.1)             |
| Nausea                               | 12 (16.7)          | 0 (0)                 |
| Fatigue                              | 11 (15.3)          | 1 (1.4)               |
| Platelet count decreased             | 11 (15.3)          | 7 (9.7)               |
| Anemia                               | 8 (11.1)           | 3 (4.2)               |
| Diarrhea                             | 8 (11.1)           | 1 (1.4)               |
| Pyrexia                              | 6 (8.3)            | 1 (1.4)               |
| Lymphocyte count decreased           | 6 (8.3)            | 5 (6.9)               |
| White blood cell count decreased     | 5 (6.9)            | 3 (4.2)               |
| Tumor lysis syndrome                 | 5 (6.9)            | 3 (4.2)               |
| Aspartate aminotransferase increased | 4 (5.6)            | 1 (1.4)               |

|                                    |         |         |
|------------------------------------|---------|---------|
| Febrile neutropenia                | 3 (4.2) | 3 (4.2) |
| Thrombocytopenia                   | 3 (4.2) | 1 (1.4) |
| Blood creatinine increased         | 3 (4.2) | 1 (1.4) |
| Alanine aminotransferase increased | 2 (2.8) | 0 (0)   |
| Hyperglycemia                      | 2 (2.8) | 1 (1.4) |
| Hyponatremia                       | 2 (2.8) | 1 (1.4) |
| Flank pain                         | 2 (2.8) | 1 (1.4) |
| Cough                              | 2 (2.8) | 0 (0)   |
| Hypoxia                            | 2 (2.8) | 1 (1.4) |
| Disseminated tuberculosis          | 1 (1.4) | 1 (1.4) |
| Pneumonia                          | 1 (1.4) | 1 (1.4) |
| Pulmonary sepsis                   | 1 (1.4) | 1 (1.4) |
| Hemoglobin decreased               | 1 (1.4) | 1 (1.4) |
| Acute kidney injury                | 1 (1.4) | 1 (1.4) |
| Pneumonitis                        | 1 (1.4) | 1 (1.4) |
| Hypothyroidism                     | 1 (1.4) | 0 (0)   |

<sup>a</sup>Includes National Cancer Institute Common Terminology Criteria for Adverse Events, version 4.0, preferred terms neutrophil count decreased and neutropenia.

TRAEs, treatment-related adverse events.

**Table S2. Immune-related adverse events and infusion reactions in disease cohorts and the total study population**

|                     | <b>Pembrolizumab + Dinaciclib</b> |                           |                        |                                       |
|---------------------|-----------------------------------|---------------------------|------------------------|---------------------------------------|
| <b>irAEs, n (%)</b> | <b>rrCLL<br/>n = 17</b>           | <b>rrDLBCL<br/>n = 38</b> | <b>rrMM<br/>n = 17</b> | <b>All disease cohorts<br/>N = 72</b> |
| No irAEs            | 14 (82.4)                         | 36 (94.7)                 | 16 (94.1)              | 66 (91.7)                             |
| One or more irAEs   | 3 (17.6)                          | 2 (5.3)                   | 1 (5.9)                | 6 (8.3)                               |
| Hyperthyroidism     | 0 (0)                             | 1 (2.6)                   | 0 (0)                  | 1 (1.4)                               |
| Hypothyroidism      | 1 (5.9)                           | 0 (0)                     | 0 (0)                  | 1 (1.4)                               |
| Infusion reactions  | 2 (11.8)                          | 1 (2.6)                   | 0 (0)                  | 3 (4.2)                               |
| Pneumonitis         | 0 (0)                             | 0 (0)                     | 1 (5.9)                | 1 (1.4)                               |

CLL, chronic lymphocytic leukemia; DLBCL, diffuse large B-cell lymphoma; irAEs, immune-related adverse events; MM, multiple myeloma; rr, relapsed or refractory.
